# Supplementary material
Source: Springer Nature journal article supplement (https://www.springermedizin.de/resource/supplementary/13054_2009_8306_MOESM4_ESM.pdf/9731668)

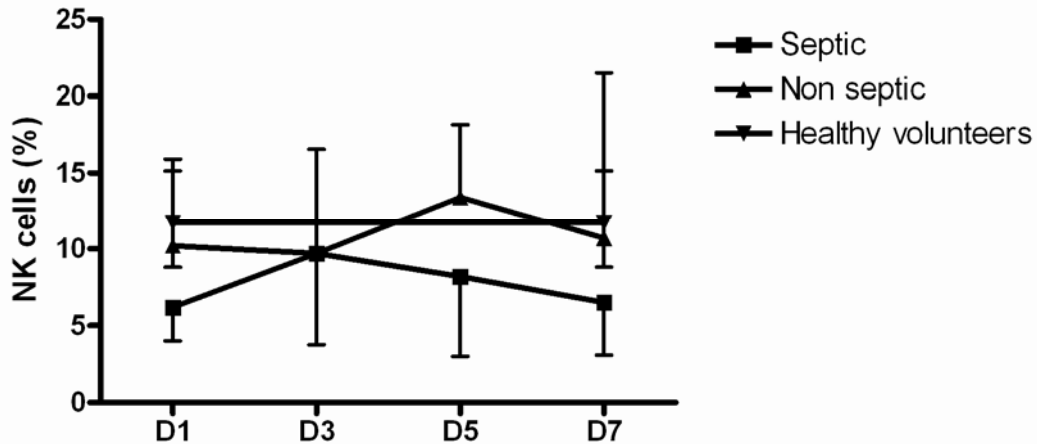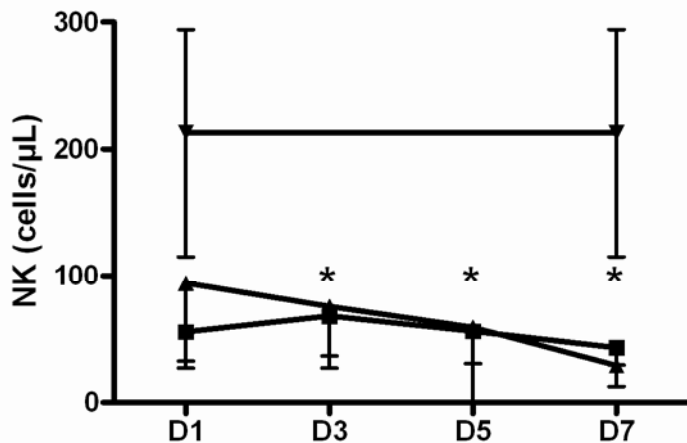

Subject at risk

|            |    |    |    |    |
|------------|----|----|----|----|
| Septic     | 26 | 24 | 19 | 13 |
| Non septic | 17 | 15 | 8  | 5  |

Supplement: MOESM4 [file 9731668]
